# Supplementary material for: Core–shell Co@CoO catalysts for the hydroformylation of olefins
Source: Royal Society of Chemistry journal article supplement (doi:10.1039/d2nj02797f), 2022-01-01
Supplement: d2nj02797f1.pdf [file d2nj02797f1.pdf]

Electronic Supplementary Material (ESI) for New Journal of Chemistry

## Supporting information

### Core-Shell Co@CoO Catalysts for the Hydroformylation of Olefins

Wen Xu<sup>a</sup>, Yuan Ma<sup>a</sup>, Xinjia Wei<sup>a</sup>, Honghui Gong<sup>a</sup>, Xiuge Zhao<sup>a,\*</sup>, Yuxi Qin<sup>a</sup>, Qingpo Peng<sup>a</sup>, and  
Zhenshan Hou<sup>a,\*</sup>

<sup>a</sup>Key Laboratory for Advanced Materials, Research Institute of Industrial Catalysis, School of Chemistry & Molecular Engineering, East China University of Science and Technology, 130 Meilong Road, Xuhui District, Shanghai 200237, China.

\*Corresponding Authors

Prof. Zhenshan Hou,

E-mail: houzhenshan@ecust.edu.cn

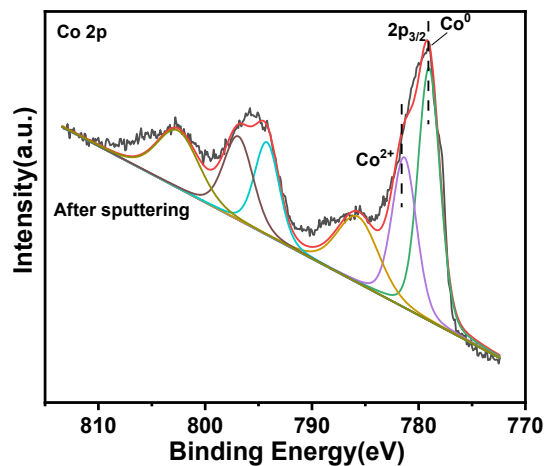

Fig. S1. XPS spectra of Co 2p for Co@CoO-PEG after Argon ion sputtering.

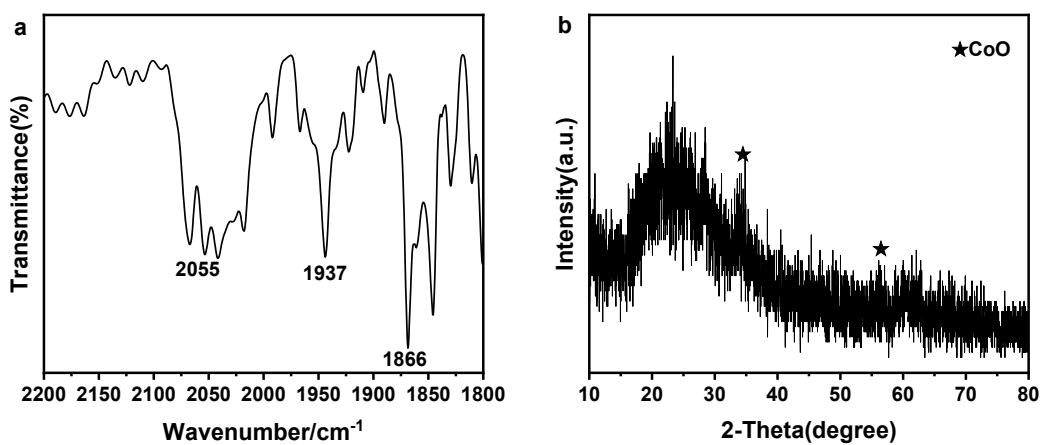

Fig. S2. (a) FT-IR spectra of the filtrate after reaction on  $\text{CoO}_x$ -W catalyst; (b) XRD patterns of the residual solid after the solvent in the filtrate was evaporated.



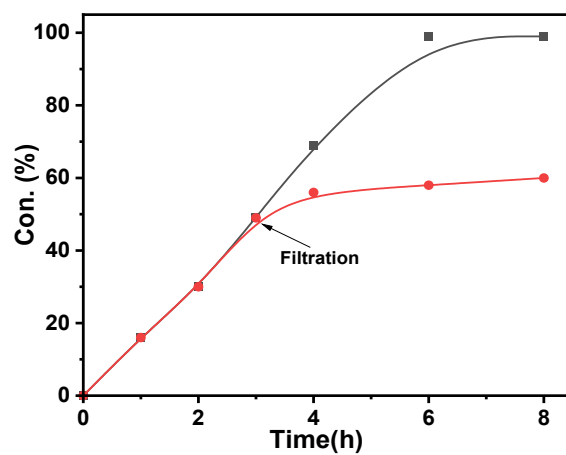

Fig. S3. Time profile of the 1-octene hydroformylation catalyzed by Co@CoO-PEG. The solid squares denoted the original time profile of hydroformylation. The solid circles represent the catalytic activities without catalyst after hot filtration. Reaction condition: 50 mg catalyst, 2 mmol 1-octene, 4 MPa (CO/H<sub>2</sub>, V/V=1), 10 ml toluene, 130 °C.

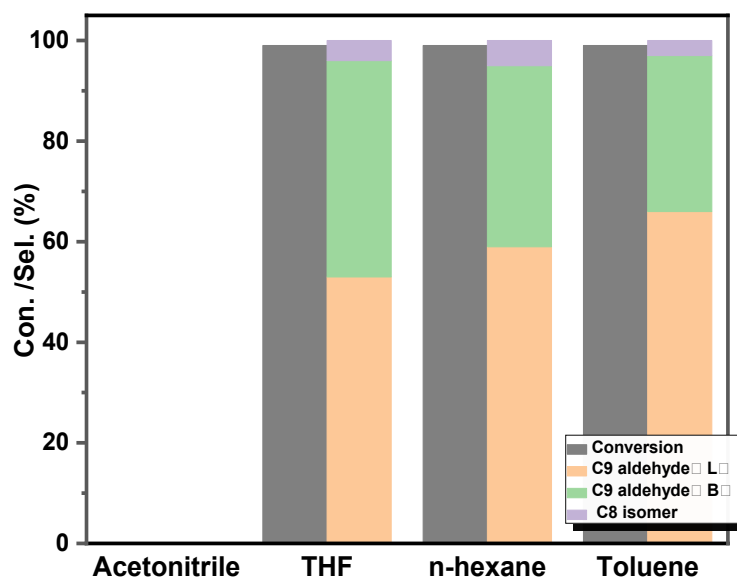

Fig. S4. The catalytic performance of Co@CoO-PEG in different solvents. Reaction condition: 50 mg catalyst, 2 mmol 1-octene, 4 MPa (CO/H<sub>2</sub>, V/V=1), 10 ml solvent, 130 °C, 8 h. L:linear and B: branch

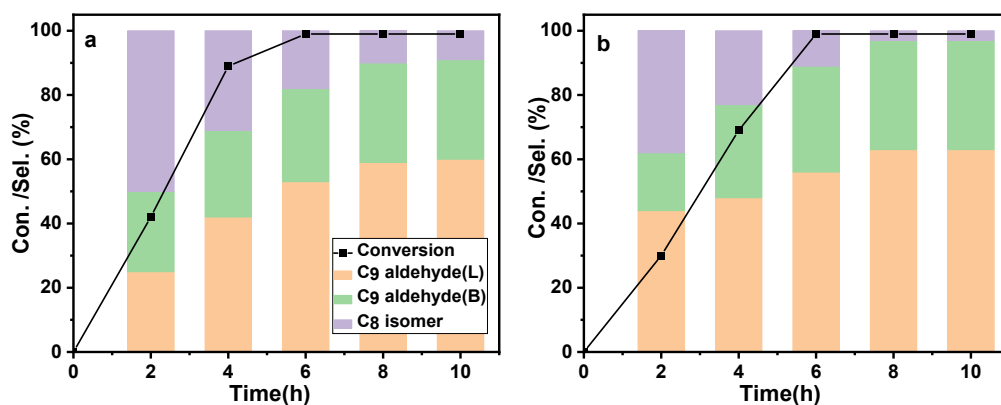

Fig. S5. The selectivity and conversion of 1-octene with different reaction time on (a) CoO<sub>x</sub>-W and (b) Co@CoO-GLY catalysts. Reaction condition: 50 mg catalyst, 2 mmol 1-octene, 4 MPa (CO/H<sub>2</sub>, V/V=1), 10 ml toluene, 130 °C. L:linear and B: branch

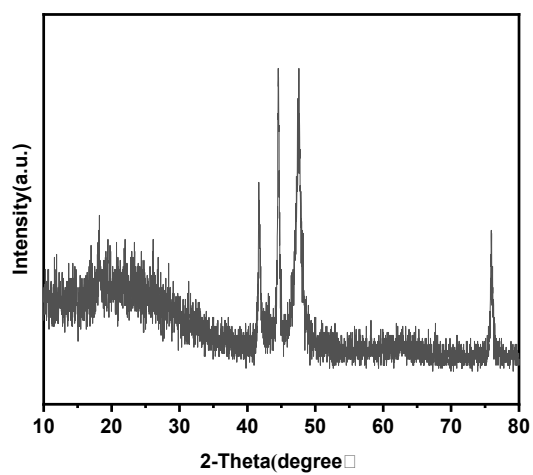

Fig. S6. XRD patterns of the spent Co@CoO-PEG catalyst after nine rounds.

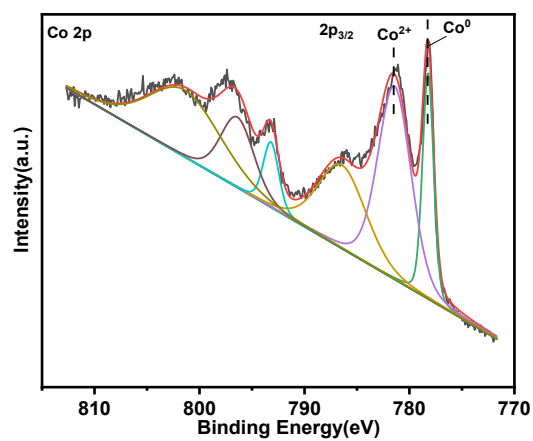

Fig. S7. Co 2p XPS spectra of for the used Co@CoO-PEG catalyst after nine rounds.



Table S1. Comparison of the catalytic performance of Co@CoO-PEG with those reported cobalt-based catalysts in the hydroformylation of olefin.

| Entry | Catalyst                                     | Substrate | P <sub>H<sub>2</sub>/CO</sub><br>(MPa) | T/°C | t/h | Con.(%)         | Aldehyde<br>Sel.(%) | Ref.         |
|-------|----------------------------------------------|-----------|----------------------------------------|------|-----|-----------------|---------------------|--------------|
| 1     | Fibrous<br>Co <sub>3</sub> O <sub>4</sub>    | 1-octene  | 5.5                                    | 150  | 12  | 92 <sup>a</sup> | -                   | 1            |
| 2     | Octahedral<br>Co <sub>3</sub> O <sub>4</sub> | 1-heptene | 4                                      | 170  | 12  | 88              | 75                  | 2            |
| 3     | Co/β-Mo <sub>2</sub> C                       | propene   | 4                                      | 160  | 10  | 28 <sup>b</sup> | -                   | 3            |
| 4     | CoZrP-2.0                                    | 1-octene  | 4                                      | 160  | 6   | 99              | 91                  | 4            |
| 5     | Co/Q-6                                       | 1-hexene  | 5                                      | 130  | 2   | 37              | 88                  | 5            |
| 6     | Co-B                                         | 1-octene  | 5                                      | 120  | 2.5 | 71              | 99                  | 6            |
| 7     | Ultrafine<br>cobalt                          | 1-hexene  | 2.4                                    | 100  | 1   | 95              | 38                  | 7            |
| 8     | Co/SiO <sub>2</sub>                          | 1-hexene  | 5                                      | 100  | 5   | 61              | 90                  | 8            |
| 9     | Co/phen@C                                    | 1-octene  | 4                                      | 100  | 18  | 94              | 73                  | 9            |
| 10    | Co@CoO-<br>PEG                               | 1-octene  | 4                                      | 130  | 8   | 99              | 97                  | This<br>work |

<sup>a</sup>The products includes alcohols, isomerized and hydrogenated substrates. <sup>b</sup>The butyraldehydes and butanols were detected as products.

## References

1. S. S. Bhagade, S. R. Chaurasia and B. M. Bhanage, *Catal. Today*, 2018, **309**, 147-152.
2. J. E. Lee, D. H. Chun, G. B. Rhim, D. Deviana, H. D. Jeong, J. C. Park, K. Y. Koo, S. K. Jeong, C. S. Hong and M. H. Youn, *Fuel*, 2020, **269**, 117397.
3. B. Wei, X. Liu, Y. Deng, K. Hua, J. Chen, H. Wang and Y. Sun, *ACS Catal.*, 2021, **11**, 14319-14327.
4. H. Gong, X. Zhao, Y. Qin, W. Xu, X. Wei, Q. Peng, Y. Ma, S. Dai, P. An and Z. Hou, *J. Catal.*, 2022, **408**, 245-260.

5. Y. Zhang, K. Nagasaka, X. Qiu and N. Tsubaki, *Catal. Today*, 2005, **104**, 48-54.
6. L. Ma, Q. Peng and D. He, *Catal. Lett.*, 2009, **130**, 137-146.
7. Z. Cai, H. Wang, C. Xiao, M. Zhong, D. Ma and Y. Kou, *J. Mol. Catal. A: Chem.*, 2010, **330**, 94-98.
8. J. Zhao, Y. He, F. Wang, W. Zheng, C. Huo, X. Liu, H. Jiao, Y. Yang, Y. Li and X. Wen, *ACS Catal.*, 2019, **10**, 914-920.
9. M. F. Hertrich, F. K. Scharnagl, A. Pews-Davtyan, C. R. Kreyenschulte, H. Lund, S. Bartling, R. Jackstell and M. Beller, *Chem. Eur. J.*, 2019, **25**, 5534-5538.
